# Supplementary material for: Inclusive innovation in crop gene editing for smallholder farmers: Status and approaches
Source: Oxford University Press journal article supplement (doi:10.1525/elementa.2022.00089), 2023-01-01
Supplement: table_s1.docx [file table_s1.docx]

**Supplemental material**

**Inclusive innovation in crop gene editing for smallholder farmers: status and approaches**

Koen Beumer¹* and Sanne de Roij¹

¹ Copernicus Institute of Sustainable Development, Utrecht University, Utrecht, the Netherlands
* Corresponding author, [k.beumer@uu.nl](mailto:k.beumer@uu.nl)

**Supplementary Table 1: List of crops for smallholder farmers**

*Supplementary table 1: list of crops for smallholder farmers*

| ***Latin name*** | **English name** |
| --- | --- |
| 1. *Abelmoshus esculentus/caillei* | Okra |
| 1. *Adansonia digitate* | Baobab |
| 1. *Allanblackia floribunda* | Veg tallow tree |
| 1. *Allanblackia stulhmanii* | Allanblackia |
| 1. *Allium cepa* | Onion |
| 1. *Amaranthus cruentus* | Grain amaranth |
| 1. *Amaranthus spp.* | Amaranth |
| 1. *Amaranthus tricolor* | Vegetable amaranth |
| 1. *Anacardium occidentale* | Cashew |
| 1. *Ananas comosus* | Pineapple |
| 1. *Annona reticulata* | Custard Apple |
| 1. *Annona senegalensis* | Wild Custard Apple |
| 1. *Artocarpus altilis* | Breadfruit |
| 1. *Artocarpus heterophyllus* | Jack Tree |
| 1. *Balanites aegyptiaca* | Balanites |
| 1. *Basella alba* | Vine spinach |
| 1. *Boscia senegalensis* | Aizen, Nabedega |
| 1. *Brassica carinata* | Ethiopia Mustard |
| 1. *Cajanus cajan* | Pigeon pea |
| 1. *Camellia sinensis* | Tea |
| 1. *Canarium madagascariense* | Canarium nut, Ramy nut |
| 1. *Capsicum annum L/frutescens L* | Chili |
| 1. *Carica papaya* | Papaya |
| 1. *Carissa spinarum* | Carissa |
| 1. *Casimiroa edulis* | White sapote |
| 1. *Cassia obtusifolia* | Sickle Senna |
| 1. *Celosia argentea* | Celosia |
| 1. *Chenopodium Quinoa* | Quinoa |
| 1. *Chrysophyllum cainito* | Star apple |
| 1. *Cicer arientinum* | Chickpea |
| 1. *Cinnamomum zeylanicum* | Cinnamon |
| 1. *Citrullus lanatus* | Watermelon |
| 1. *Cleome gynandra* | Spiderplant |
| 1. *Cocos nucifera* | Coconut |
| 1. *Coffea* | Coffee |
| 1. *Colocasia esculenta* | Taro |
| 1. *Corchorus olitorius* | Jute mallow |
| 1. *Crassocephalum rubens* | Yoruban bologi |
| 1. *Crotalaria juncea* | Sunn hemp |
| 1. *Crotalaria ochroleuca* | Rattlebox |
| 1. *Cucumis metuliferus* | Horned Melon |
| 1. *Cucurbita maxima* | Pumpkin |
| 1. *Cyphomandra betacea* | Cape tomato |
| 1. *Dacryodes edulis* | African Plum |
| 1. *Detarium senegalense/microcarpum* | Sweet detar |
| 1. *Digitaria exilis* | Fonio |
| 1. *Dioscorea alata* | Yams |
| 1. *Dioscorea dumetorum* | Bitter yam |
| 1. *Dioscorea rotundata* | Yams |
| 1. *Dioscorea spp* | Yam |
| 1. *Diospyros mespiliformis* | African persimmon |
| 1. *Dovyalis caffra* | Kei Apple |
| 1. *Elaeis guineensis* | Oil palm |
| 1. *Eleusine coracana* | Finger Millet |
| 1. *Ensete ventirocosum* | Enset |
| 1. *Eragrostis tef* | Tef |
| 1. *Fagopyrum Escelentum* | Buckwheat |
| 1. *Faidherbia albida* | Acacia (Apple-ring) |
| 1. *Garcinia livingstonii* | African Mangosteen |
| 1. *Garcinia mangostana* | Mangosteen |
| 1. *Glycine max* | Soybean (Sub Saharan Africa only) |
| 1. *Gnetum africanum* | African Gnetum |
| 1. *Gossypium* | Cotton |
| 1. *Guizotia abyssinica* | Noug |
| 1. *Hevea brasiliensis* | Rubber |
| 1. *Hibiscus sabdariffa* | Roselle |
| 1. *Hordeum vulgare* | Barley |
| 1. *Icacina oliviformis* | False yam |
| 1. *Ipomoea batatas* | Sweet potato |
| 1. *Ipomoea batatas* | Sweet Potato Leaves |
| 1. *Irvingia gabonensis* | Sweet bush mango |
| 1. *Lablab purpureus* | Lab lab Bean |
| 1. *Landolphia spp* | Gumvines |
| 1. *Lannea microcarpa* | Tree grapes |
| 1. *Lathyrus Sativus* | Grass pea |
| 1. *Lens culinaris* | Lentil |
| 1. *Linum unitatissimum* | Linseed |
| 1. *Macadamia ternifolia* | Macadamia |
| 1. *Macrotyloma geocarpum* | Geocarpa groundnut |
| 1. *Macrotyloma uniflorum* | Horsegram |
| 1. *Mangifera indica* | Mango |
| 1. *Manihot esculentum* | Cassava |
| 1. *Momordica charantia* | Bittergourd |
| 1. *Moringa oleifera* | Drumstick tree, |
| 1. *Moringa oleifera* | Moringa |
| 1. *Morus alba* | Mulberry |
| 1. *Musa spp.* | Banana |
| 1. *Musa spp.* | Plantain |
| 1. *Olea europaea* | Olive (oil) |
| 1. *Opuntia monacantha* | Prickly pear |
| 1. *Oryza sativa* | Rice |
| 1. *Orzya glaberrima* | African rice |
| 1. *Panicum miliaceum* | Millet |
| 1. *Parinari curatellifolia* | Mobola plum |
| 1. *Parkia biglobosa* | African Locust |
| 1. *Passiflora edulis* | Passion Fruit |
| 1. *Persea americana* | Avocado |
| 1. *Phaseolus* | Beans |
| 1. *Phaseolus vulgaris* | Green Bean |
| 1. *Pisum* | Pulses (other) |
| 1. *Plectranthus esculentus/rontundifolius* | African Potato |
| 1. *Psidium guajava* | Guava |
| 1. *Ricinodendron heudelotii* | Groundnut |
| 1. *Rinicus communis* | Castor bean |
| 1. *Saba comorensis* | Rubber vines |
| 1. *Saba senegalensis* | Nsaban, kabaa |
| 1. *Sclerocarya birrea* | Marula |
| 1. *Sesamum indicum* | Sesame |
| 1. *Solanum aethiopicum* | African Eggplant |
| 1. *Solanum lycopersicum* | Tomato |
| 1. *Solanum scabrum* | African Nightshade |
| 1. *Solanum tuberosum* | Potato |
| 1. *Sorghum bicolor* | Sorghum |
| 1. *Sphenostylis stenocarpa* | Yambean |
| 1. *Strychnos cocculoides* | Natal orange |
| 1. *Strychnos spinosa* | African Orange |
| 1. *Syzygium guineense* | Water berry |
| 1. *Talinum fruticosum* | Ceylon spinach |
| 1. *Tamarindus indica* | Tamarind |
| 1. *Telfairia occidentalis* | Fluted gourd |
| 1. *Theobroma cacao* | Cocoa |
| 1. *Triticum* | Wheat |
| 1. *Tylosema esculentum* | Marama bean |
| 1. *Uapaca kirkiana* | Wild loquat |
| 1. *Vangueria madagascariensis/infausta* | African Medlars |
| 1. *Vanilla Planifolia.* | Vanilla |
| 1. *various names* | Pulses (aggregate) |
| 1. *Vicia faba* | Favabean |
| 1. *Vigna radiata* | Mungbean |
| 1. *Vigna subterranean* | Bambara groundnut |
| 1. *Vigna ﻿unguiculata* | Cowpea |
| 1. *Vitellaria paradoxa* | Shea Butter |
| 1. *Vitex doniana* | Chocolate berries |
| 1. *Xanthosoma sagittifolium* | Elephant ears |
| 1. *Xanthosoma spp* | Cocoyams, Arrowroots |
| 1. *Ximenia caffra* | Sour plum |
| 1. *Zea mays* | Maize |
| 1. *Ziziphus mauritiana* | Jujube |
