# Supplementary material for: Inclusive innovation in crop gene editing for smallholder farmers: Status and approaches
Source: Oxford University Press journal article supplement (doi:10.1525/elementa.2022.00089), 2023-01-01
Supplement: table_s3.docx [file table_s3.docx]

**Supplemental material**

**Inclusive innovation in crop gene editing for smallholder farmers: status and approaches**

Koen Beumer¹* and Sanne de Roij¹

¹ Copernicus Institute of Sustainable Development, Utrecht University, Utrecht, the Netherlands
* Corresponding author, [k.beumer@uu.nl](mailto:k.beumer@uu.nl)

**Supplementary Table 3: Distributive justice approaches of gene editing projects for smallholder farmers**

|  | Pro-poor | | Fairness | | Equalizing | |
| --- | --- | --- | --- | --- | --- | --- |
|  | Spacecraft | Helicopter | Spacecraft | Helicopter | Spacecraft | Helicopter |
| 1. Intention | All projects select crops and traits for their potential to benefit the poor | | Not found | One project selects crops and traits for female farmers | Not found | Several projects want to build research capacity in global South |
| 2. Consumption | All projects target poor farmers and take measures to ensure availability and affordability | | Not found | One project focuses on female farmers |  |  |
| 3. Impact | All projects aim to increase food security and income of smallholders | | Not found | Handful of projects aim to either reduce child labor, positively impact women, or overcome racial disparity | All projects aim to structurally increase smallholder income and change direction of technological change | |
| 4. Process | Not found | All projects consult with smallholders throughout the project | Not found | Two projects include female smallholders | Two projects generate extra income for smallholders via dissemination | Four projects generate extra income for smallholders via dissemination |
| 5. Structure | All projects share technical knowledge, most projects abstain from (enforcing) IPR, all projects aim to release affordably | | Not found | Not found | Most projects abstain from (enforcing) IPR | Most projects abstain from (enforcing) IPR  Several project build research capacity in global South |
| 6. Post-structure | Not found | All projects include smallholder knowledge, most projects communicate in local languages, and most projects are part of organizations with smallholder goals | Not found | One project includes knowledge of female smallholders | Not found | Not found |
